# Supplementary material for: Dynamic disulfide bond networks enable self-healable and mechanically resilient intrinsically stretchable organic solar cells
Source: Royal Society of Chemistry journal article supplement (doi:10.1039/d5ee01082a), 2025-01-01
Supplement: d5ee01082a1.pdf [file d5ee01082a1.pdf]

## Electronic Supplementary Information

### Dynamic disulfide bond networks enable self-healable and mechanically resilient intrinsically stretchable organic solar cells

*Wenyu Yang,<sup>a</sup> Xuanang Luo,<sup>a</sup> Jiankang Liu,<sup>a</sup> Jingchuan Chen,<sup>a</sup> Xuefei Wu,<sup>b</sup> Zachary Fink,<sup>b</sup> Chuqi Shi,<sup>c</sup> Wenkai Zhong\*,<sup>a</sup>, Cheng Wang,<sup>d</sup> Lei Ying\*,<sup>a</sup>*

<sup>a</sup> Institute of Polymer Optoelectronic Materials and Devices, Guangdong Basic Research Center of Excellence for Energy & Information Polymer Materials, State Key Laboratory of Luminescent Materials and Devices, South China University of Technology, Guangzhou 510640, China

E-mail: wkzhong@scut.edu.cn; msleiying@scut.edu.cn

<sup>b</sup> Materials Science Division, Lawrence Berkeley National Laboratory, Berkeley, CA 94720, United States

<sup>c</sup> Tsinghua Shenzhen International Graduate School, Tsinghua University, Shenzhen 518055, China

<sup>d</sup> Advanced Light Source, Lawrence Berkeley National Laboratory, Berkeley, CA 94720, United States

## Experimental Section

### Materials

All reagents and chemicals were purchased from commercial suppliers, including Aldrich, Alfa Aesar, and J&K, and used without further purification unless otherwise noted. PTzBI-oF was supplied by Dongguan VoltAmp Optoelectronics Technology Co., Ltd. PYIT and PNDIT-F3N were obtained from Solarmer Inc. (China), and PETMP was sourced from Tokyo Chemical Industry.

### Synthesis

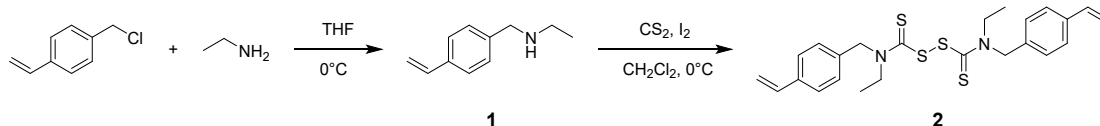

**Scheme 1.** Synthetic route of BVTD molecule (compound 2).

#### *Preparation of N-(4-vinylbenzyl)ethanamine (1)*

Compound 1 was prepared following a previously reported method.<sup>[1]</sup>

#### *Preparation of N, N'-diethyl-N, N'-bis(4-vinylbenzyl)thiuram disulfide (BVTD) (2)*

Compound 2 was synthesized according to a similar reported procedure.<sup>[2]</sup> Compound 1 (8.06 g, 50 mmol) and chloroform (25 mL) were placed in a round-bottom flask cooled in an ice bath. Carbon disulfide (1.5 mL, 25 mmol) and iodine (3.18 g, 12.5 mmol) were then added sequentially. The reaction mixture was stirred for 3 hours and subsequently washed with water. The organic phase was dried by anhydrous Na<sub>2</sub>SO<sub>4</sub>, concentrated under reduced pressure, and purified by column chromatography (silica gel) using a mixture of petroleum ether:ethyl acetate as the eluent, giving a 3.65 g transparent yellow oil. (Yield: 70%) <sup>1</sup>H NMR (500 MHz, CDCl<sub>3</sub>): δ = 7.39 (d, *J* = 7.9 Hz, 4H), 7.29 (d, *J* = 7.9 Hz, 4H), 6.69 (dd, *J* = 17.5, 10.9 Hz, 2H), 5.72 (d, *J* = 17.5 Hz, 2H), 5.26 (d, *J* = 10.9 Hz, 2H), 4.03 (s, 4H), 1.43 (q, *J* = 7.1 Hz, 4H), 1.26 (t, *J* = 7.1 Hz, 6H).

### **Fabrication of OSC devices with rigid substrates**

The solar cell devices were fabricated with the structure ITO/PEDOT:PSS/active layer/PNDIT-F3N/Ag. ITO-patterned glass substrates were sequentially cleaned by sonication in detergent, deionized water, and isopropyl alcohol. After drying in an oven, the substrates were treated with oxygen plasma for 2 minutes and then spin-coated with PEDOT:PSS (Clevios PVP Al 4083) at 4000 rpm, achieving a thickness of ~15 nm. The PEDOT:PSS films were then annealed on a hot plate at 150 °C for 15 minutes in air. Subsequently, the substrates were moved to a nitrogen-filled glovebox. For blend films without network, PTzBI-oF and PYIT were dissolved in chloroform at concentrations of 8 mg/mL, and then PTzBI-oF and PYIT were sequentially casted. For blend films with network, PETMP and BVTD (1:2, wt:wt) were pre-dissolved in chloroform at 8 mg/mL at room temperature, and then added to the PTzBI-oF solution. The PTzBI-oF solution was spin-coated onto the PEDOT:PSS layer at 1500 rpm and thermally annealed at 100 °C for 5 minutes. The thiol-ene click based crosslinked reaction was done through 365 nm UV illumination for 5 minutes during thermal annealing. Next, the PYIT layer was spin-coated at 2000 rpm and thermally annealed at 100 °C for 5 minutes. A 1 mg/mL PNDIT-F3N methanol solution was then spin-coated on top of the active layer at 3000 rpm. Finally, a 100 nm layer of Ag was thermally evaporated onto the interface through a shadow mask in a vacuum chamber at a pressure of  $3 \times 10^{-7}$  torr. The effective device area was defined as 0.05 cm<sup>2</sup>, with the active area further limited to 0.032 cm<sup>2</sup> using a non-refractive mask to improve measurement accuracy.

### **Fabrication of IS-OSC devices**

The IS-OCS devices were fabricated with the structure TPU/PEDOT:PSS (M-PH1000)/PEDOT:PSS (4083)/active layer/PNDIT-F3N/EGaIn@Ag. The stretchable, transparent electrode was prepared by modifying PH1000 with the addition of 5 vol% dimethyl sulfoxide, 2 vol% polyethylene glycol, 0.5 vol% FS-30, and 0.1% GOPS. The resulting solution was spin-coated onto a TPU substrate at 1500 rpm, followed by

baking at 100°C for 20 minutes. Next, PEDOT:PSS (4083) was spin-coated onto the PH1000/TPU layer at 3000 rpm and dried at 100 °C for 20 minutes. The active layers were then spin-coated using the same conditions as for the rigid OSC fabrication. Then, PNDIT-F3N (methanol solution, 1 mg/mL) was spin-coated at 3000 rpm on the active layers. Finally, a 100 nm thick Ag layer was thermally evaporated onto the interface through a shadow mask in a vacuum chamber at a pressure of  $3 \times 10^{-7}$  torr. EGaIn liquid metal was then sprayed onto the Ag layer using a deposition mask, yielding the EGaIn@Ag stretchable electrodes. The effective area of the fabricated device was defined as 0.04 ( $0.2 \times 0.2$ ) cm<sup>2</sup>.

### OSC device characterizations

*J-V* curves were measured using a Keithley 2400 source meter with illumination (100 mW cm<sup>-2</sup>) provided by an AM 1.5G solar simulator (SS-F5-3A, Enlitech) in a nitrogen-filled glovebox. Devices were tested using a mask to redefine the active layer area to 0.032 cm<sup>2</sup>.

*J-V* curves were measured with a Keithley 2400 source meter under illumination (100 mW cm<sup>-2</sup>) provided by an AM 1.5G solar simulator (SS-F5-3A, Enlitech) in a nitrogen-filled glovebox. EQE spectra were measured using an EQE measurement system (QE-R3011, Enlitech), with the light intensity at each wavelength calibrated using a standard single-crystal Si solar cell before the test.

Mobilities of thin films were measured using hole-only and electron-only devices with the following structures: ITO/PEDOT:PSS/active layer/MoO<sub>3</sub>/Ag for hole mobility and ITO/ZnO/active layer/PNDIT-F3N/Ag for electron mobility. The dark *J-V* curves were recorded using a Keithley 2400 source meter. The mobilities were extracted using the space-charge-limited current (SCLC) method, based on the Mott-Gurney equation:  $J = 9\epsilon_r\epsilon_0\mu V^2/8L^3$ , where  $J$  is the current density,  $\epsilon_r$  is the relative dielectric constant of the active layer,  $\epsilon_0$  is the vacuum permittivity,  $\mu$  is the mobility,  $V$  is the effective voltage, and  $L$  is the thickness of active layer.

The photo-CELIV, dark capacitance-voltage ( $C-V$ ) and capacitance-frequency ( $C-F$ ) curves of devices were measured using the PAIOS platform (FLUXiM, Switzerland).

### **General characterizations**

$^1\text{H}$  nuclear magnetic resonance (NMR) spectrum was measured on a Bruker AV-400 MHz spectrometer with tetramethyl silane (TMS) as the internal reference. UV-vis-NIR absorption spectra of thin films were measured by a SHIMADZU UV-3600 spectrophotometer. The films were prepared by spin-coating their solutions onto quartz substrates. X-ray photoelectron spectroscopy (XPS) was determined by British Kratos X-ray photoelectron spectroscopy for element analysis. The films were spin-coated on ITO substrates. Time-of-flight secondary ion mass spectrometry (TOF-SIMS) was conducted using a Nano TOF II instrument (ULVAC PHI, Japan). A  $\text{Bi}_2^{3+}$  cluster primary-ion gun operating at 30 kV was employed for analysis, with a GCIB beam (5 keV, 5 nA) used for sputtering at a rate of 0.2 nm/s for depth profiling. The analysis was carried out over a  $100\ \mu\text{m} \times 100\ \mu\text{m}$  area, while sputtering covered a  $300\ \mu\text{m} \times 300\ \mu\text{m}$  area. Atomic force microscopy (AFM) images were obtained using a NanoScope NS3A system (Digital Instruments). AFM-infrared (AFM-IR) spectroscopy was performed using an Anasys nanoIR3 system (Bruker).

Grazing incidence wide angle X-ray scattering (GIWAXS) was performed on a Xenocs Xeuss 2.0 system equipped with an Excillum MetalJet-D2 X-ray source, operated at 70.0 kV and 2.8570 mA. The X-ray wavelength was 1.341 Å. PTzBI-oF/PYIT thin films were spin-coated onto PEDOT:PSS-coated silicon wafers under the same conditions used for OSC device fabrication. The X-ray beam was incident at an angle of  $0.20^\circ$  to probe the bulk film structure. The sample-to-detector distance was  $\sim 210$  mm, and the scattering patterns were collected using a DECTRIS PILATUS3 R 1M area detector. Data processing and analysis were carried out using the Igor Pro-based Nika software package. Resonant soft X-ray scattering (RSoXS) was performed at beamline 11.0.1.2 of the Advanced Light Source (ALS), Lawrence Berkeley National Laboratory (LBNL). Films were spin-coated onto PEDOT:PSS/silicon wafer

substrates. The films were floated on deionized water by dissolving the PEDOT:PSS layer and then transferred onto silicon nitride windows for scattering experiments in transmission mode. Scattering images were captured using a Princeton Instruments PI-MTE CCD camera with a pixel size of  $0.027 \text{ mm} \times 0.027 \text{ mm}$ . Data reduction was performed using the Igor-based Nika package.<sup>[3]</sup>

### **Stress-strain ( $\sigma$ - $\epsilon$ ) curves of thin films**

Tensile tests were performed by a free-standing method, as reported previously.<sup>[4]</sup> The active layer solution was spin-coated onto a PEDOT:PSS-coated glass substrate. Sequential post-treatments were same as the OSC device fabrication. The sample was then placed on deionized water. As the PEDOT:PSS dissolves in water, the active layer floats on the surface. Then, the clamps of a tensile stage, equipped with frosted aluminum blocks, were adjusted to carefully capture the floating film through van der Waals forces. The deionized water was then gradually removed, leaving a free-standing active layer film on the tensile stage. The film was stretched at a speed of  $0.03 \text{ mm/min}$ . The stress ( $\sigma$ ) and strain ( $\epsilon$ ) were calculated using the following equations:

$$\text{Stress} = F / (A \times B)$$

$$\text{Strain} = \Delta l / l_0$$

where  $F$  is the applied force recorded by a highly sensitive force sensor,  $A$  is the width of the film (10-12 mm),  $B$  is the thickness of the film,  $\Delta l$  is the elongation of the film, and  $l_0$  is the initial distance between the clamps.

### **Density function theory (DFT) and molecular dynamics (MD) simulation**

Molecular conformations were optimized using the Gaussian 16 software at the B3LYP-D3/6-31G\*\* and PM6-D3 levels to obtain bimolecular geometries. Interactions were subsequently calculated at the B3LYP-D3/TZVP level. The results were analyzed and visualized using the Multiwfn<sup>5</sup> and VMD<sup>6</sup> software packages.

Molecular dynamics (MD) simulations were conducted using the DFT-optimized conformations to construct amorphous cells according to the following protocol: each

simulation cell contained three donor decamers, five acceptor tetramers, and 0/4 wt%/8 wt% of BVTD crosslinked networks. The initial density of the system was set to 0.5 g cm<sup>-3</sup>. After energy minimization, the systems were subjected to a stress-strain procedure using the Forcite module, with applied stress increasing sequentially from 0 to 0.1, 0.5, 1.0, and 1.5 GPa. Final snapshots were collected under 1.5 GPa stress. A representative PYIT molecule was highlighted in red to evaluate the molecular mobility.

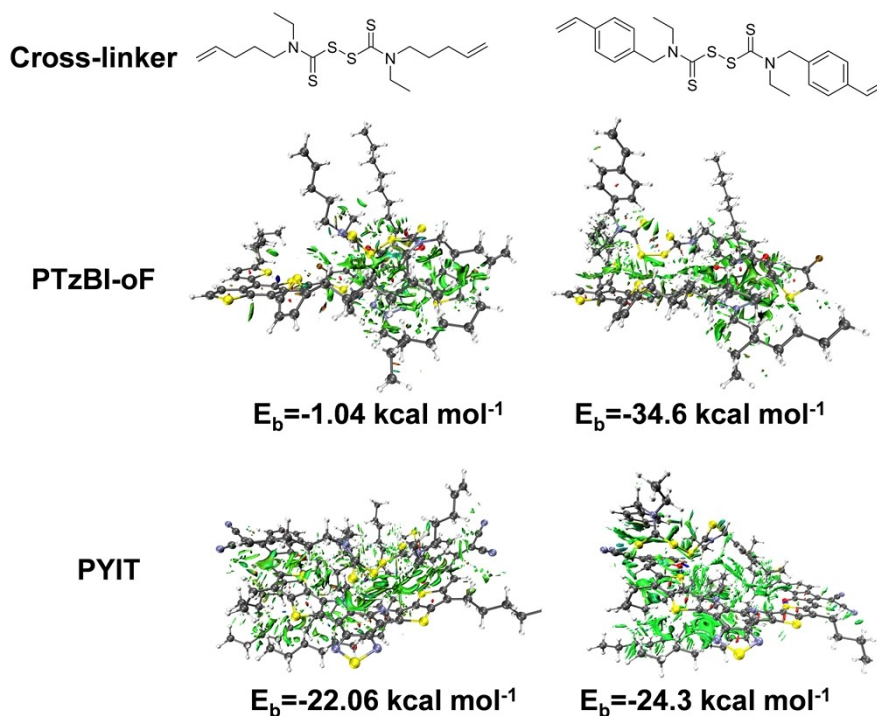

**Fig. S1** Calculated binding energies ( $E_b$ ) between cross-linker molecules (without or with phenyl groups) and conjugated polymer fragments (PTzBI-oF or PYIT).

**(a) Hole-only devices**

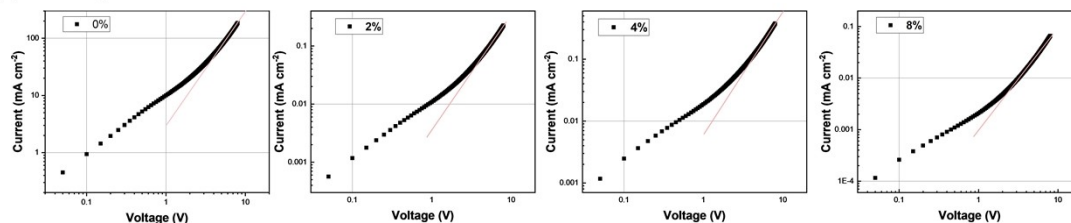

**(b) Electron-only devices**

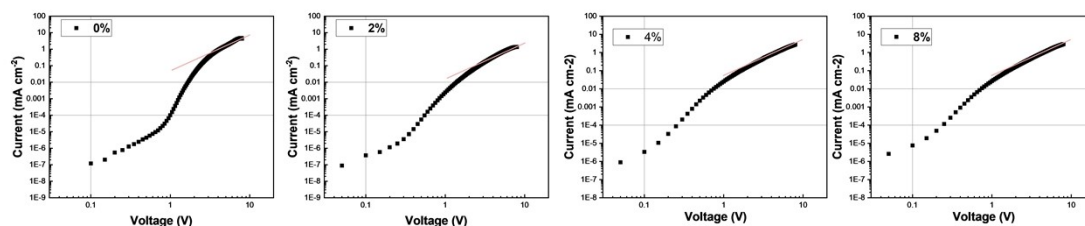

**Fig. S2** The  $J$ - $V$  curves of (a) hole-only devices and (b) electron-only devices based on (PTzBI-oF+network)/PYIT, where the network was prepared with varying BVTD ratios (0%, 2%, 4%, and 8%). The red lines indicate the SCLC regions used for the calculation of mobilities.



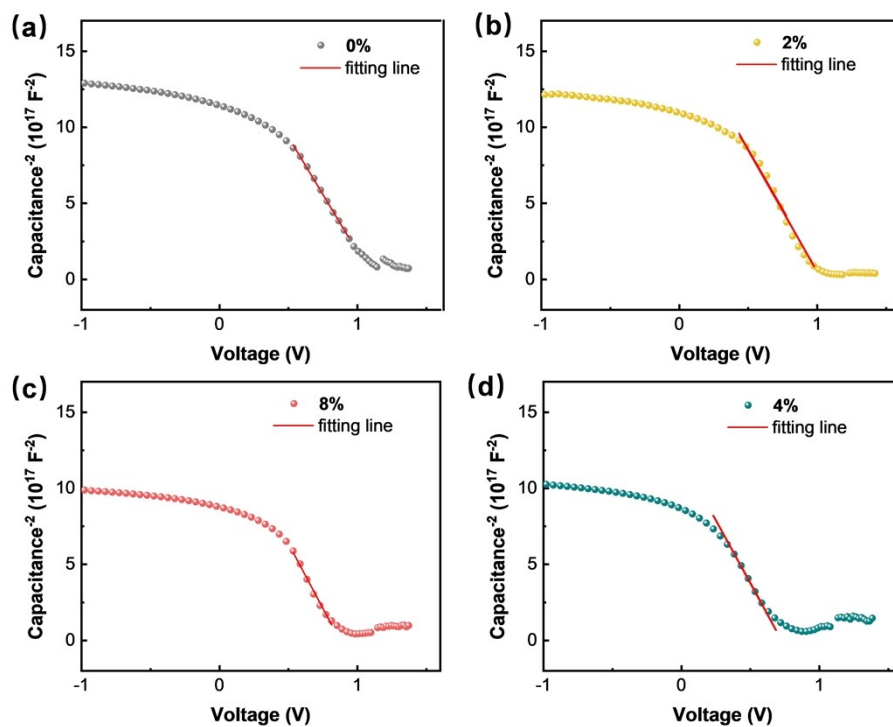

**Fig. S3**  $1/C^2$ - $V$  plot of OSCs fabricated with varying BVTD ratios and the results of the fitting line in the linear region.

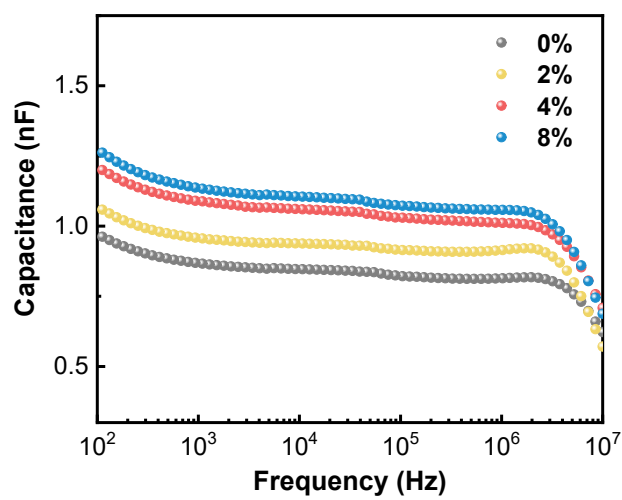

**Fig. S4**  $C$ - $F$  characteristics of OSCs fabricated with varying BVTD ratios.

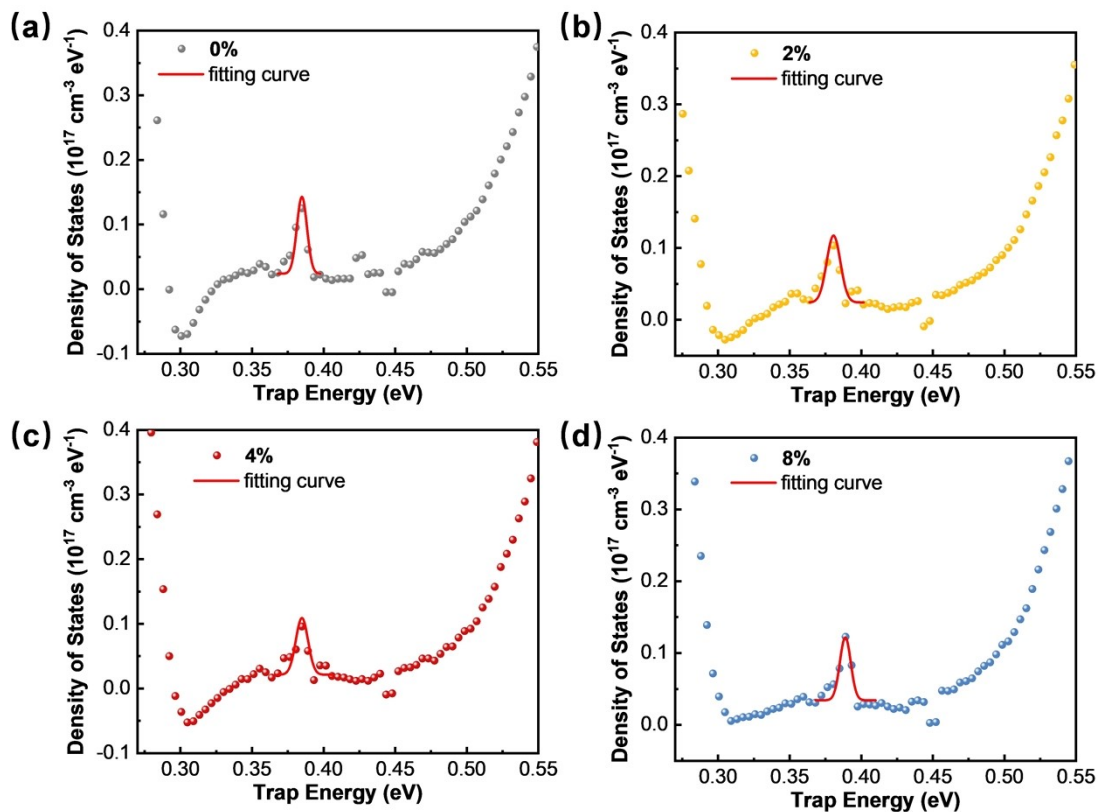

**Fig. S5** tDOS- $E_{\omega}$  curves of OSCs fabricated with varying BVTD ratios and the fitting results.

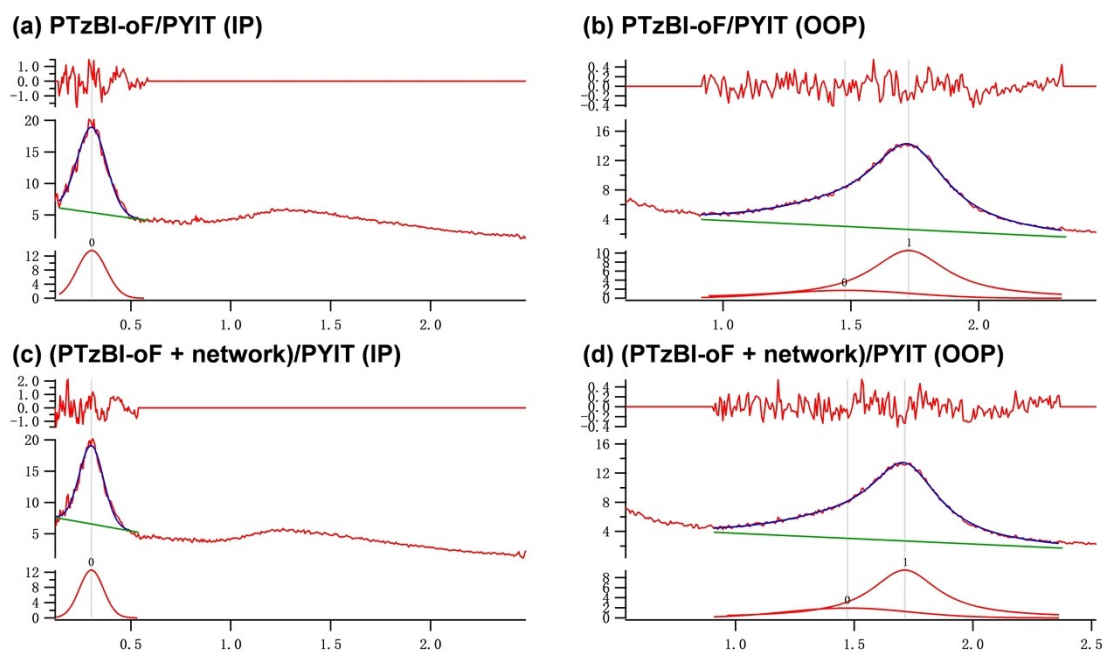

**Fig. S6** Peak-fitting for GIWAXS I-q curves in the IP and OOP directions of (a,b) PTzBI-oF/PYIT, (c,d) (PTzBI-oF + network)/PYIT films.

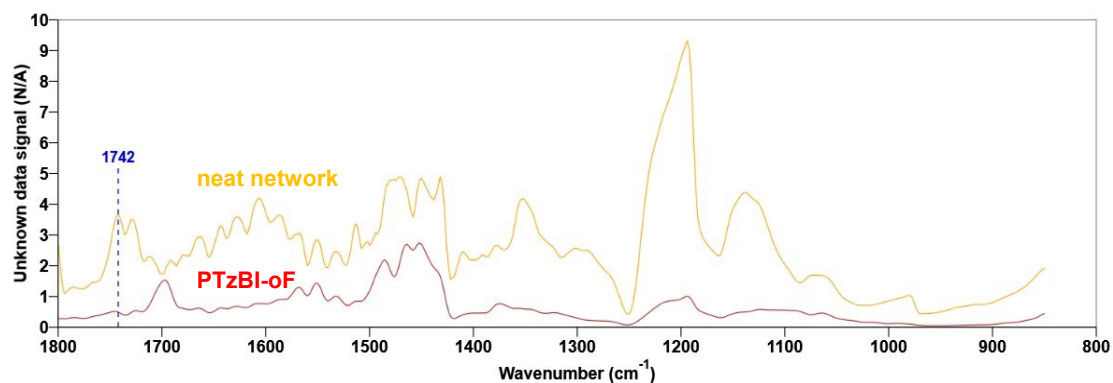

**Fig. S7** IR spectra of PTzBI-oF and the network (BVTD:PETMP = 2:1) thin film, where the wavenumber of 1742 cm<sup>-1</sup> can be used to highlight the network by AFM-IR.

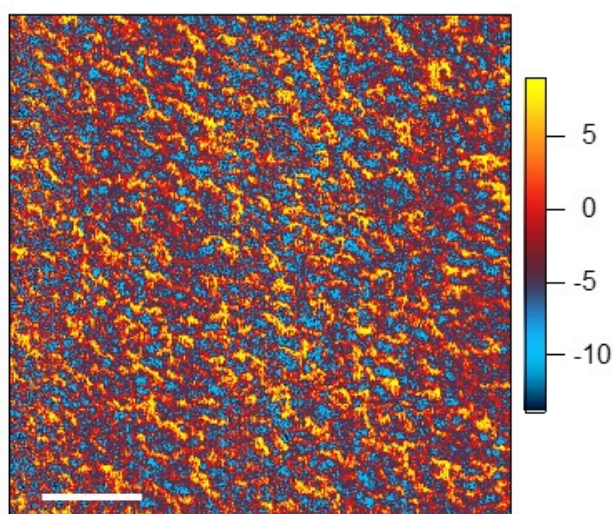

**Fig. S8** AFM-IR images of PTzBI-oF + network (8% BVTD) thin film probed at 1742 cm<sup>-1</sup>, while scale bar in the image represents 0.25 μm, and the color bar indicates the IR amplitude.

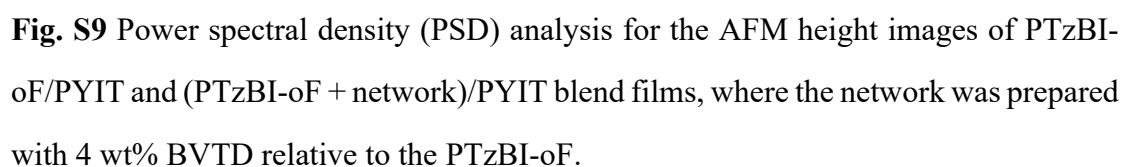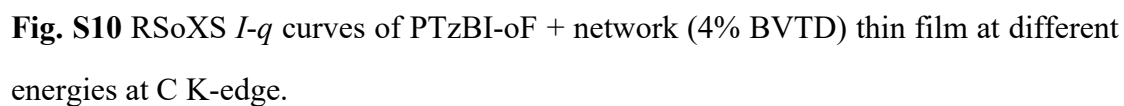

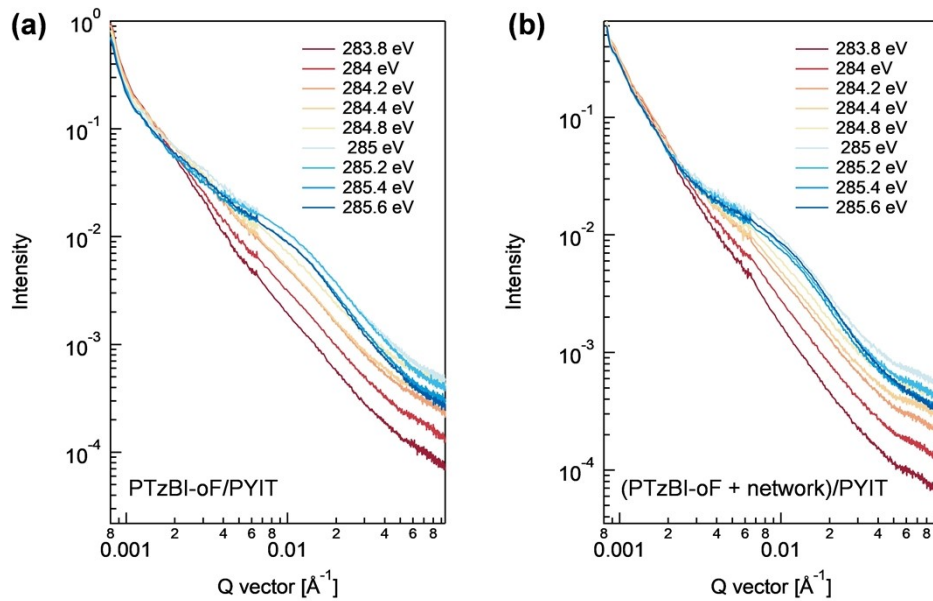

**Fig. S11** RSoXS  $I$ - $q$  curves of PTzBI-oF/PYIT, (PTzBI-oF + network)/PYIT blend thin film at different energies at C K-edge. The network was prepared with 4 wt% BVTB relative to the PTzBI-oF.

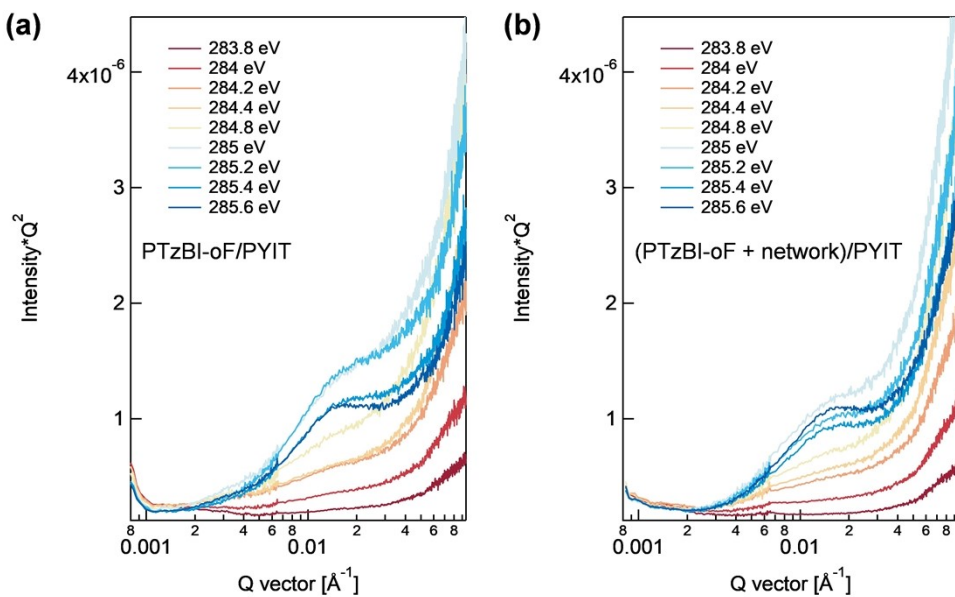

**Fig. S12** RSoXS  $Iq^2$ - $q$  curves of PTzBI-oF/PYIT, (PTzBI-oF + network)/PYIT blend thin film at different energies at C K-edge. The network was prepared with 4 wt% BVTB relative to the PTzBI-oF.

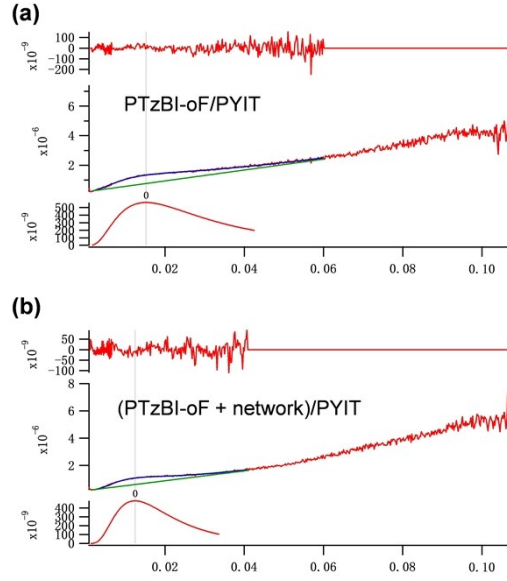

**Fig. S13** Peak-fitting for RSoXS  $Iq^2$ - $q$  curves with log-normal functions.

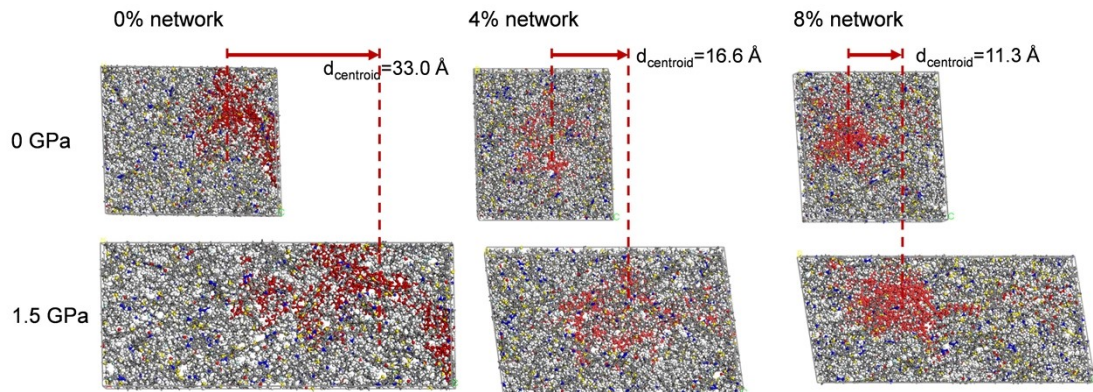

**Fig. S14** Snapshots of D/A blended cells with different network densities prepared by varying the BVTD ratio (0%, 4%, and 8%) under stress-strain molecular dynamics simulation (with the displacement of the centroid of a specific PYIT tetramers marked in red).



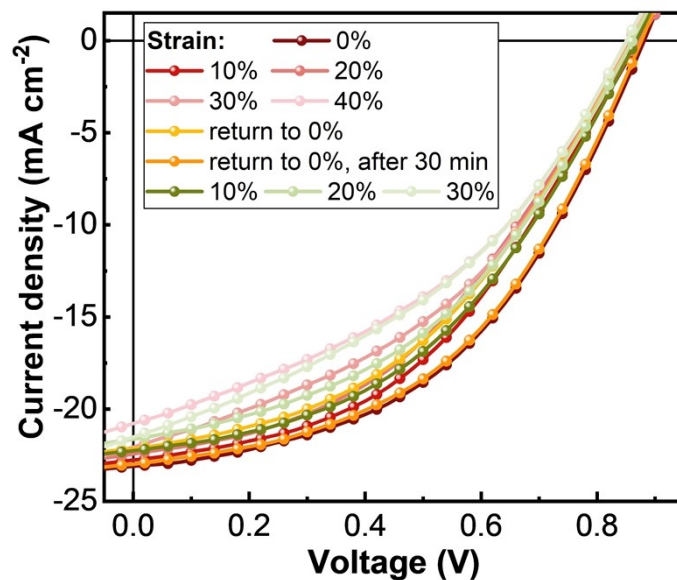

**Fig. S15**  $J$ - $V$  curves of IS-OSC devices of (PTzBI-oF + network)/PYIT blend films under various strains. The network was prepared with 8 wt% BVTD relative to PTzBI-oF.

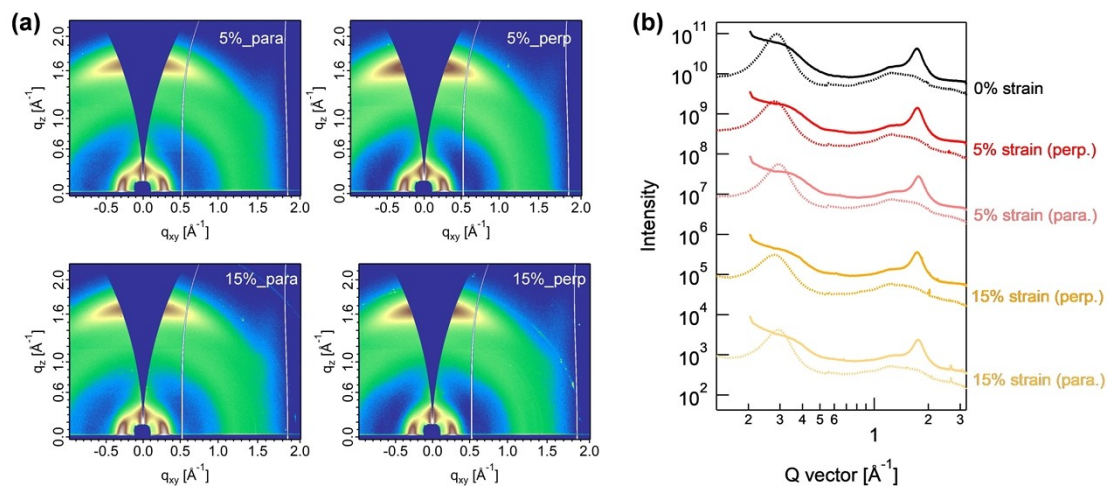

**Fig. S16** GIWAXS (a) 2D images and (b)  $I$ - $q$  curves of (PTzBI-oF + network)/PYIT blend films under various strains. The network was prepared with 4 wt% BVTD relative to PTzBI-oF. GIWAXS was performed with X-ray beam perpendicular (perp.) and parallel (para.) to the strain directions.

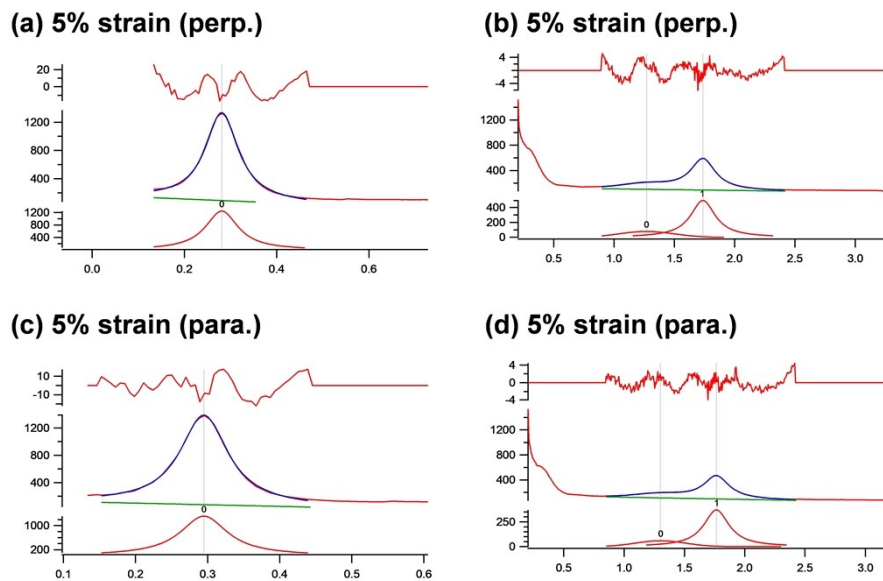

**Fig. S17** Peak-fitting for GIWAXS  $I$ - $q$  curves in the (a,c) IP and (b,d) OOP directions of the PTzBI-oF + network blend films under 5% strain.

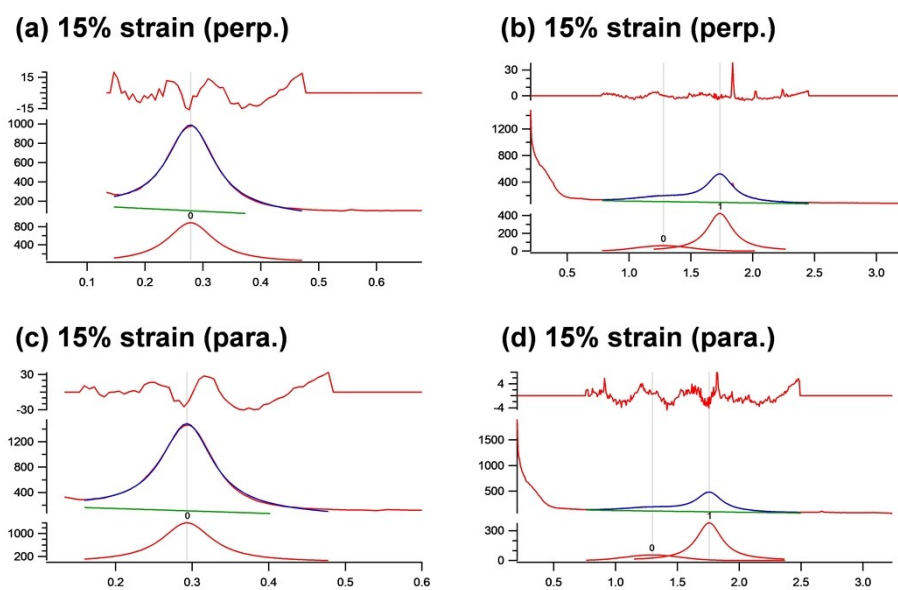

**Fig. S18** Peak-fitting for GIWAXS  $I$ - $q$  curves in the (a,c) IP and (b,d) OOP directions of the PTzBI-oF + network blend films under 15% strain.



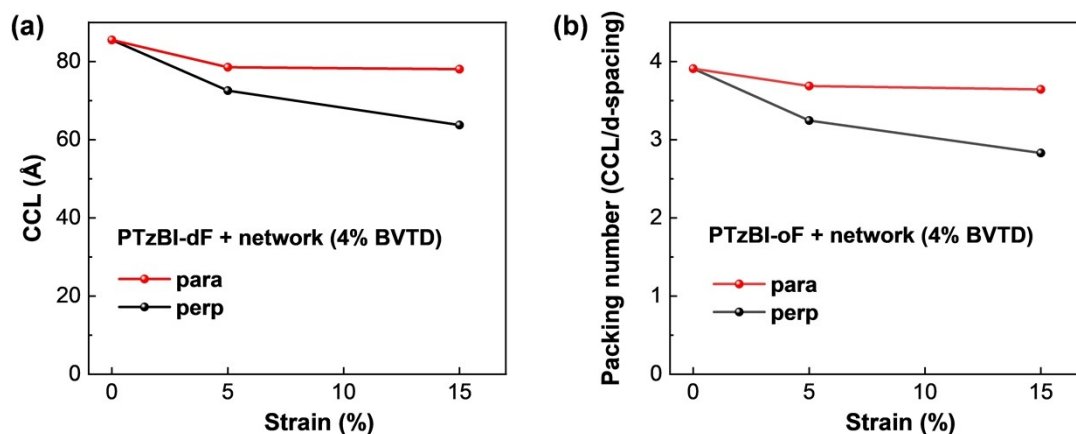

**Fig. S19** (a) CCLs and (b) packing numbers (=CCL/d-spacing) of (PTzBI-oF + network)/PYIT blend films under various strains. The network was prepared with 4 wt% BVTD relative to PTzBI-oF. GIWAXS was performed with X-ray beam perpendicular (perp.) and parallel (para.) to the strain directions.

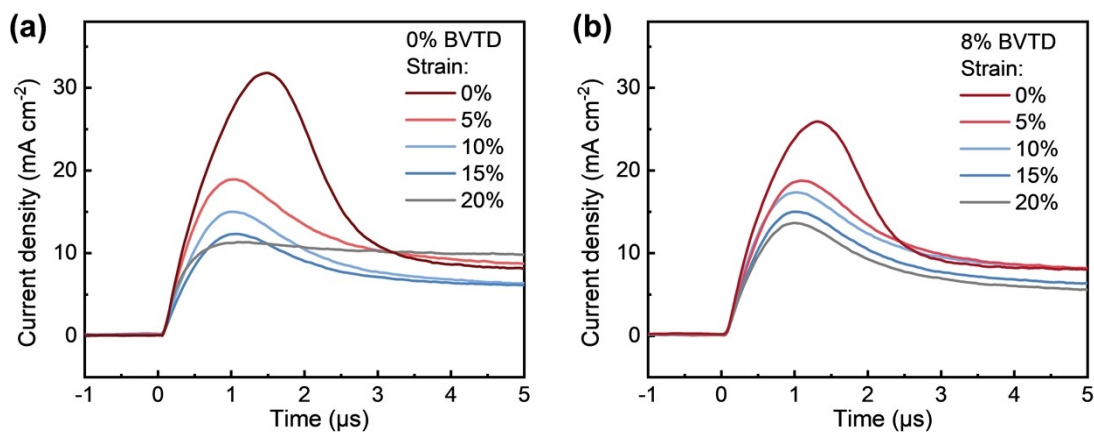

**Fig. S20** Photo-CELIV characteristics of IS-OSC devices under various strains: (a) pristine PTzBI-oF/PYIT device; (b) 8%-BVTD network based device.

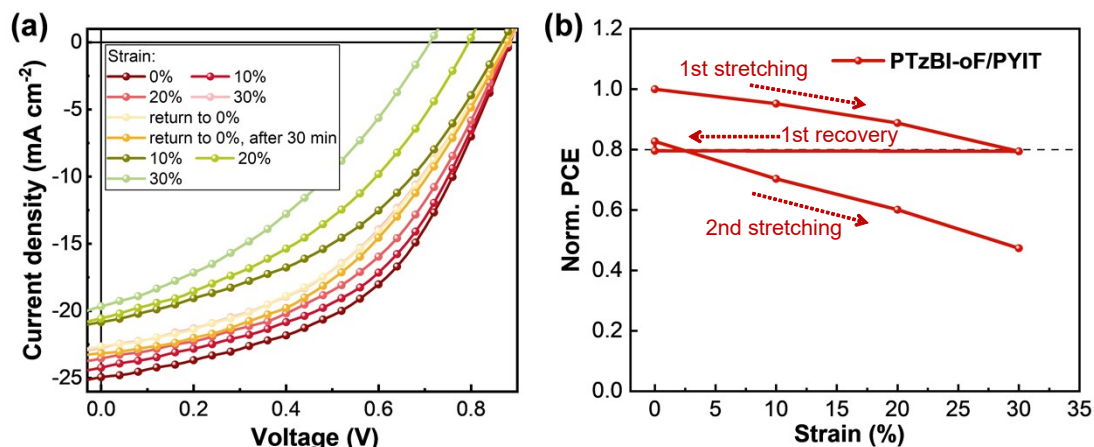

**Fig. S21** (a)  $J$ - $V$  curves and (b) normalized PCE changes of IS-OSC devices of PTzBI-oF/PYIT blend films under various strains.

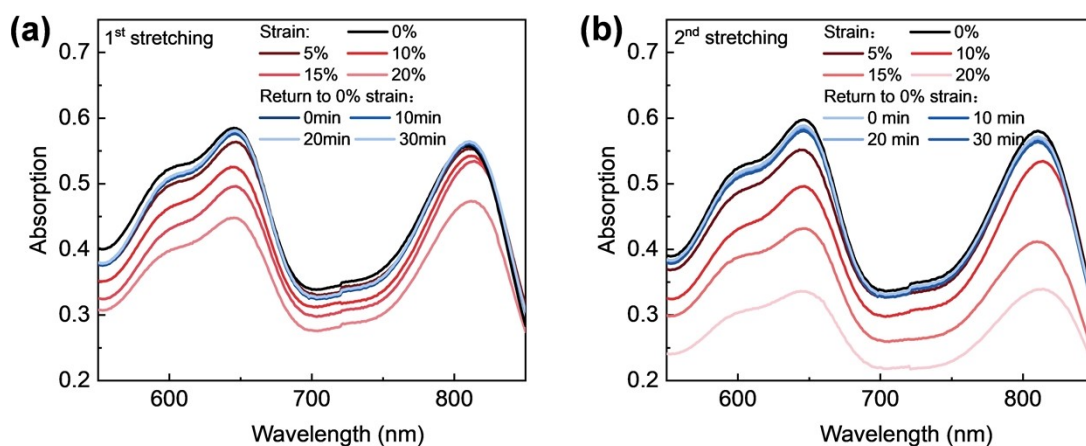

**Fig. S22** *In situ* UV-vis-NIR spectra of PTzBI-oF/PYIT thin film prepared with 8% BVTd: (a) 1st stretching-recovery cycle; (b) 2nd stretching-recovery cycle.

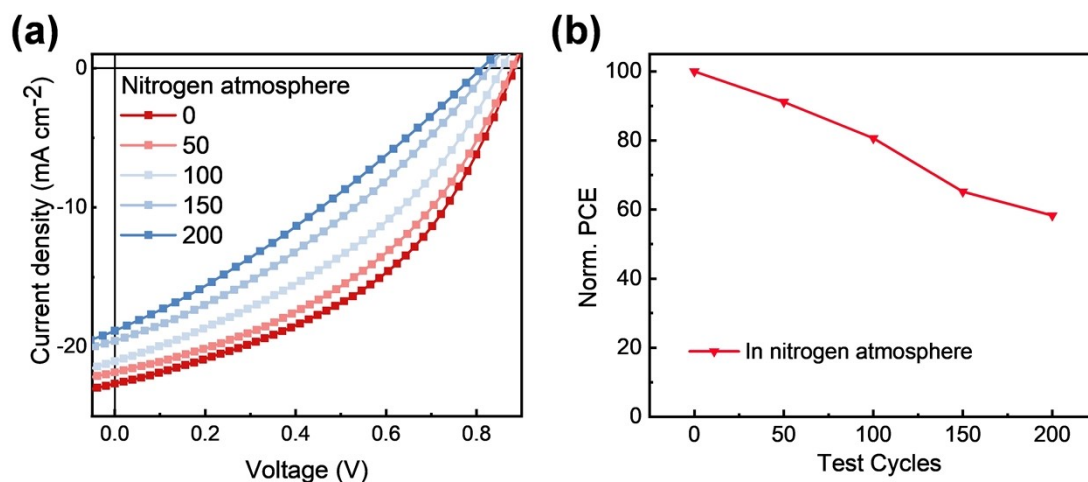

**Fig. S23** (a)  $J$ - $V$  curves and (b) corresponding normalized PCE as function of test cycles of IS-OSC devices prepared with 8% BVTD. The stretching-releasing cycles of 20% strain were performed in a nitrogen-filled glove box (25 °C,  $\text{O}_2 < 5$  ppm,  $\text{H}_2\text{O} < 0.01$  ppm).

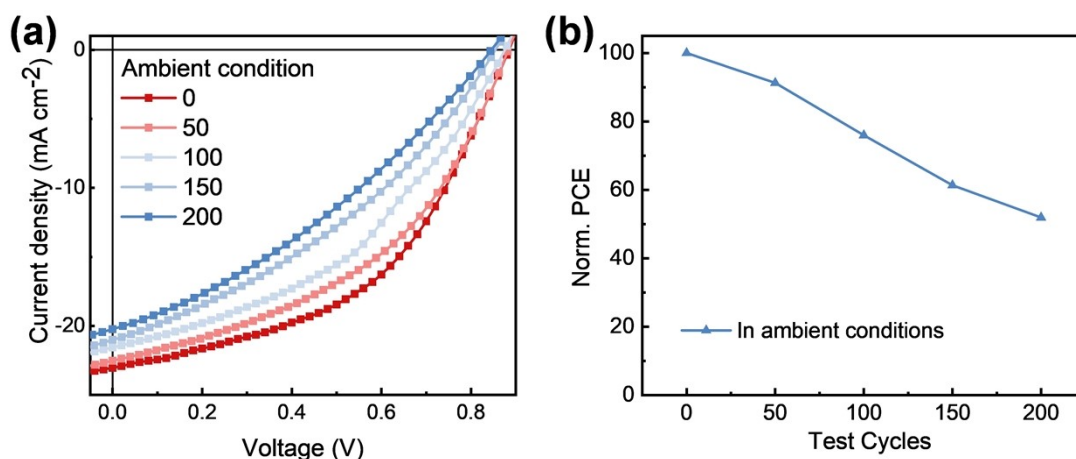

**Fig. S24** (a)  $J$ - $V$  curves and (b) corresponding normalized PCE as function of test cycles of IS-OSC devices prepared with 8% BVTD. The stretching-releasing cycles of 20% strain were performed under ambient conditions (25 °C, ~40% RH, atmospheric oxygen).

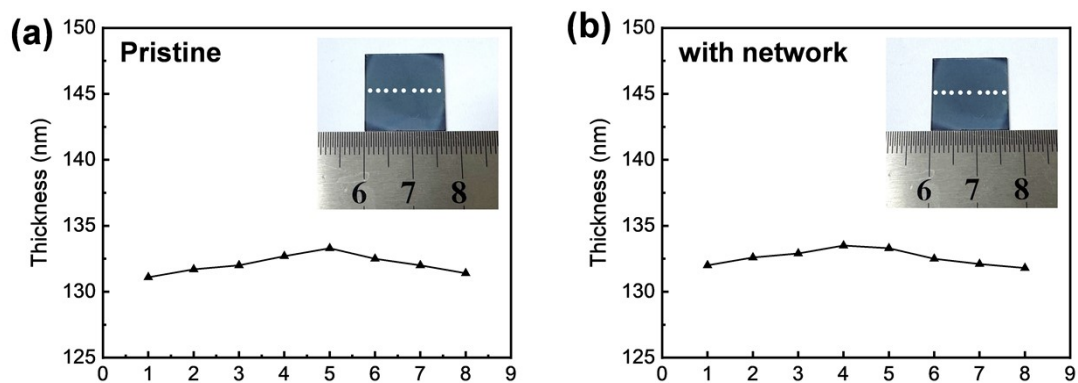

**Fig. S25** Thickness distribution measured at multiple positions across PTzBI-oF/PYIT thin films: (a) pristine film; (b) film incorporating a self-healable network with 8% BVTD. White dots in the insets indicate the locations of profilometer measurements.

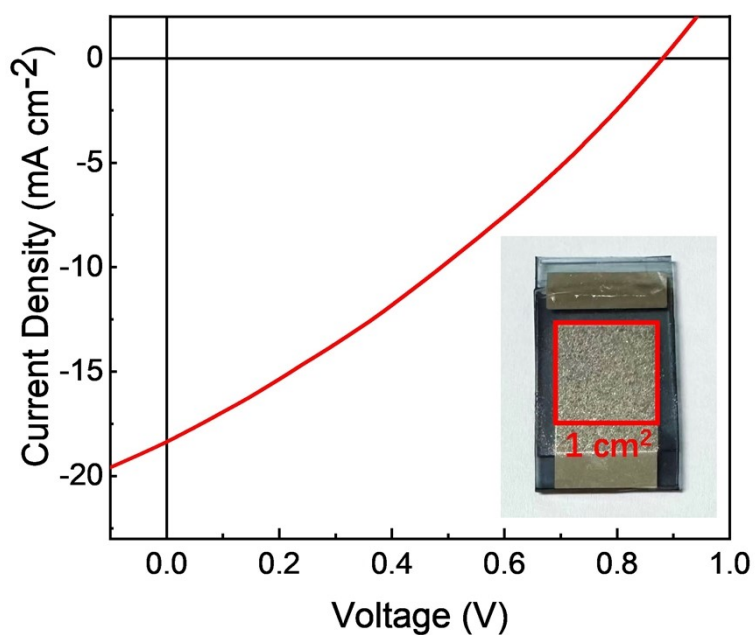

**Fig. S26** The  $J-V$  curve of the 1-cm<sup>2</sup> IS-OSC device and the image of the device (insert).

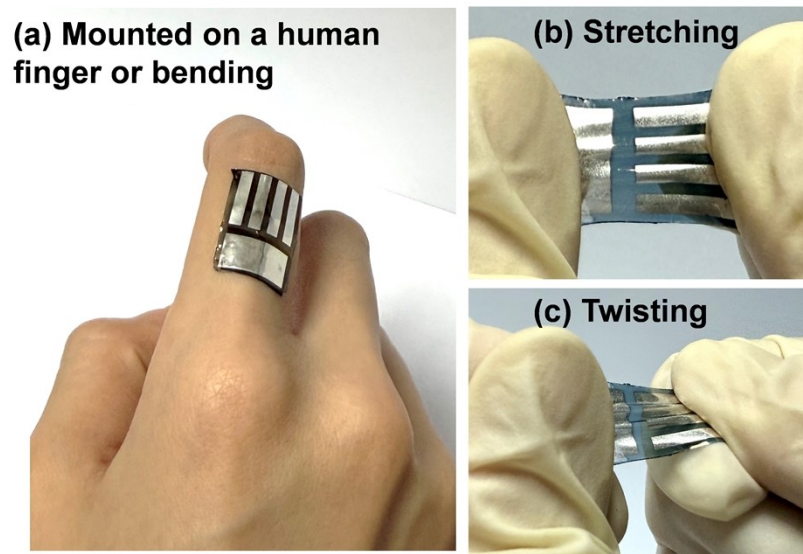

**Fig. S27** Visual demonstrations of IS-OSC devices under realistic wearable conditions: (a) mounted on a human finger or bending; (b) stretching; (c) bending.

**Table S1.** Mechanisms and healing conditions for different dynamic systems.

| Dynamic systems   | Diels-Alder adducts                                                                                                         | Disulfide exchange                                                        | Imine bonds                                                                            |
|-------------------|-----------------------------------------------------------------------------------------------------------------------------|---------------------------------------------------------------------------|----------------------------------------------------------------------------------------|
| Mechanism         | Thermally-reversible [4+2] cycloaddition between a conjugated diene and a dienophile, breaking and reforming two C–C bonds. | Reversible thiol–disulfide interchange on an S–S bond                     | Hydrolysis of imine bonds (C=N) to form amines and aldehydes, followed by condensation |
| Healing condition | thermal treatment at 100-150 °C for bond dissociation, followed by a cooling process for re-bonding<br>External heating     | Disulfide bonds can react reversibly at low heat or even room temperature | Dynamic covalent bonding dependent on environmental pH and humidity                    |
| References        | 7-8                                                                                                                         | 9-10                                                                      | 11,12                                                                                  |

**Table S2.** The hole and electron mobilities of (PTzBI-oF + network)/PYIT blend films measured by SCLC method. The self-healable network was prepared with varying BVTD ratios.

| BVTD ratio (%) | $\mu_h$ (cm <sup>2</sup> V <sup>-1</sup> s <sup>-1</sup> ) | $\mu_e$ (cm <sup>2</sup> V <sup>-1</sup> s <sup>-1</sup> ) |
|----------------|------------------------------------------------------------|------------------------------------------------------------|
| 0              | 1.44×10 <sup>-4</sup>                                      | 2.31×10 <sup>-4</sup>                                      |
| 2              | 1.02×10 <sup>-4</sup>                                      | 1.99×10 <sup>-4</sup>                                      |
| 4              | 8.29×10 <sup>-5</sup>                                      | 1.76×10 <sup>-4</sup>                                      |
| 8              | 6.95×10 <sup>-5</sup>                                      | 1.49×10 <sup>-4</sup>                                      |

**Table S3.** Summary of  $J_{\text{ph}}-V_{\text{eff}}$  parameters of OSC devices based on (PTzBI-oF + network)/PYIT blend films. The self-healable network was prepared with varying BVTD ratios.

| BVTD ratio (%) | $P_{\text{diss}}$ (%) |
|----------------|-----------------------|
| 0              | 96.12                 |
| 2              | 94.67                 |
| 4              | 92.84                 |
| 8              | 90.11                 |

**Table S4.** Summary of  $1/C^2-V$  plot parameters.

|    | $N_{\text{A}}$ (cm <sup>-3</sup> ) | $V_{\text{bi}}$ (V) |
|----|------------------------------------|---------------------|
| 0% | $1.50 \times 10^{15}$              | 1.21                |
| 2% | $1.57 \times 10^{15}$              | 1.08                |
| 4% | $1.65 \times 10^{15}$              | 0.98                |
| 8% | $1.75 \times 10^{15}$              | 0.88                |

**Table S5.** Summary of tDOS- $E_{\omega}$  plot parameters.

|    | Peak type | Location ( $E_t$ ) (eV) | Width ( $\sigma$ ) |
|----|-----------|-------------------------|--------------------|
| 0% | Gauss     | 0.3840                  | 0.00836            |
| 2% | Gauss     | 0.3806                  | 0.00895            |
| 4% | Gauss     | 0.3848                  | 0.01004            |
| 8% | Gauss     | 0.3888                  | 0.01131            |

**Table S6.** Summary of the fitting results for GIWAXS  $I$ - $q$  curves of PTzBI-oF/PYIT, and (PTzBI-oF + network)/PYIT films. The self-healable network was prepared with 4 wt% BVTD relative to PTzBI-oF.

|                           | IP                         |                               |                               |                         |      |
|---------------------------|----------------------------|-------------------------------|-------------------------------|-------------------------|------|
|                           | Q<br>( $\text{\AA}^{-1}$ ) | d-spacing<br>( $\text{\AA}$ ) | FWHM<br>( $\text{\AA}^{-1}$ ) | CCL<br>( $\text{\AA}$ ) | Area |
| PTzBI-oF/PYIT             | 0.30                       | 20.92                         | 0.17                          | 38.00                   | 2.38 |
| (PTzBI-oF + network)/PYIT | 0.30                       | 21.08                         | 0.15                          | 43.91                   | 1.96 |
|                           | OOP                        |                               |                               |                         |      |
|                           | Q<br>( $\text{\AA}^{-1}$ ) | d-spacing<br>( $\text{\AA}$ ) | FWHM<br>( $\text{\AA}^{-1}$ ) | CCL<br>( $\text{\AA}$ ) | Area |
| PTzBI-oF/PYIT             | 1.72                       | 3.70                          | 0.36                          | 17.67                   | 5.99 |
| (PTzBI-oF + network)/PYIT | 1.71                       | 3.73                          | 0.34                          | 18.67                   | 5.09 |

**Table S7.** Fitting results of RSoXS  $I$ - $q$  curves with correlation length model.

| Thin film                | PTzBI-oF/PYIT | (PTzBI-oF + network)/PYIT |
|--------------------------|---------------|---------------------------|
| Scale                    | 6.4928        | 1.1068                    |
| Background               | 0.00044       | 0.0005                    |
| $A$                      | 1.89E-07      | 6.12E-09                  |
| $C$                      | 0.001563      | 0.015934                  |
| $n$                      | 1.7423        | 2.4854                    |
| $m$                      | 2.7512        | 2.4421                    |
| $\zeta$ [ $\text{\AA}$ ] | 81.68         | 105.15                    |



**Table S8.** Mechanical parameters measured from stress-strain curves of PYIT, PTzBI-oF, PTzBI-oF + network, (PTzBI-oF + network)/PYIT films. The self-healable networks were prepared with varying weight ratios of BVTD relative to PTzBI-oF.

| Film                                | COS (%) | Young's modulus (MPa) |
|-------------------------------------|---------|-----------------------|
| PYIT                                | 5.01    | 175.68                |
| PTzBI-oF                            | 8.89    | 131.04                |
| PTzBI-oF + network (2% BVTD)        | 15.59   | 127.35                |
| PTzBI-oF + network (4% BVTD)        | 17.56   | 119.58                |
| PTzBI-oF + network (8% BVTD)        | 22.41   | 86.42                 |
| PTzBI-oF /PYIT                      | 7.10    | 164.80                |
| (PTzBI-oF + network (2% BVTD))/PYIT | 10.91   | 141.08                |
| (PTzBI-oF + network (4% BVTD))/PYIT | 15.63   | 122.24                |
| (PTzBI-oF + network (8% BVTD))/PYIT | 18.59   | 103.61                |

**Table S9.** *J-V* parameters of IS-OSCs fabricated with (PTzBI-oF + network)/PYIT blend films. The network was prepared with 8 wt% BVTd relative to PTzBI-oF.

| Cycle | Strain                         | $V_{OC}$ (V) | $J_{SC}$ (mA cm <sup>-2</sup> ) | FF (%) | PCE (%) |
|-------|--------------------------------|--------------|---------------------------------|--------|---------|
| 1st   | 0%                             | 0.881        | 23.09                           | 46.91  | 9.64    |
|       | 10%                            | 0.872        | 22.76                           | 43.86  | 8.78    |
|       | 20%                            | 0.871        | 22.43                           | 41.55  | 8.20    |
|       | 30%                            | 0.855        | 22.06                           | 40.98  | 7.72    |
|       | 40%                            | 0.852        | 20.78                           | 39.73  | 7.03    |
| 2nd   | Return to 0%                   | 0.860        | 22.14                           | 42.96  | 8.25    |
|       | Return to 0%<br>(after 30 min) | 0.876        | 22.97                           | 46.87  | 9.53    |
|       | 10%                            | 0.867        | 22.26                           | 44.02  | 8.58    |
|       | 20%                            | 0.861        | 21.64                           | 42.97  | 8.08    |
|       | 30%                            | 0.850        | 21.51                           | 38.82  | 7.10    |

**Table S10.** Summary of the fitting results for GIWAXS I-q curves of PTzBI-oF + network films under 5% and 15% strains. The self-healable network was prepared with 4 wt% BVTD relative to PTzBI-oF.

| Strain   | IP                      |                            |                            |                      |                                |
|----------|-------------------------|----------------------------|----------------------------|----------------------|--------------------------------|
|          | q ( $\text{\AA}^{-1}$ ) | d-spacing ( $\text{\AA}$ ) | FWHM ( $\text{\AA}^{-1}$ ) | CCL ( $\text{\AA}$ ) | Packing number (CCL/d-spacing) |
| 0%       | 0.29                    | 21.88                      | 0.073                      | 85.50                | 3.91                           |
| 5%-perp  | 0.28                    | 22.35                      | 0.087                      | 72.54                | 3.25                           |
| 5%-para  | 0.29                    | 21.30                      | 0.080                      | 78.53                | 3.69                           |
| 15%-perp | 0.28                    | 22.522                     | 0.099                      | 63.75                | 2.83                           |
| 15%-para | 0.29                    | 21.42                      | 0.080                      | 78.04                | 3.64                           |

  

|          | OOP                     |                            |
|----------|-------------------------|----------------------------|
|          | q ( $\text{\AA}^{-1}$ ) | FWHM ( $\text{\AA}^{-1}$ ) |
| 0%       | 1.73                    | 0.25                       |
| 5%-perp  | 1.74                    | 0.25                       |
| 5%-para  | 1.76                    | 0.25                       |
| 15%-perp | 1.73                    | 0.25                       |
| 15%-para | 1.76                    | 0.25                       |

**Table S11.** Summary of photo-CELIV mobilities of PTzBI-oF/PYIT IS-OSC devices under various strains.

| Device   | 0%   | 5%   | 10%  | 15%  | 20%  |
|----------|------|------|------|------|------|
| pristine | 7.51 | 5.84 | 4.07 | 2.60 | 0.31 |
| 8%-BVTD  | 6.92 | 5.17 | 4.68 | 4.23 | 3.99 |

**Table S12.**  $J$ - $V$  parameters of IS-OSCs based on PTzBI-oF/PYIT blend film.

| Cycle | Strain                         | $V_{OC}$ (V) | $J_{SC}$ (mA cm <sup>-2</sup> ) | FF (%) | PCE (%) |
|-------|--------------------------------|--------------|---------------------------------|--------|---------|
| 1st   | 0%                             | 0.885        | 24.93                           | 49.01  | 10.88   |
|       | 10%                            | 0.883        | 24.22                           | 48.13  | 10.36   |
|       | 20%                            | 0.880        | 23.54                           | 46.35  | 9.66    |
|       | 30%                            | 0.881        | 22.74                           | 42.86  | 8.64    |
| 2nd   | Return to 0%                   | 0.875        | 22.65                           | 43.44  | 8.66    |
|       | Return to 0%<br>(after 30 min) | 0.879        | 23.14                           | 43.98  | 9.00    |
|       | 10%                            | 0.867        | 20.83                           | 42.28  | 7.69    |
|       | 20%                            | 0.795        | 20.56                           | 39.80  | 6.54    |
|       | 30%                            | 0.711        | 19.65                           | 36.59  | 5.15    |

**Table S13.** Device parameters of IS-OSCs under stretching-releasing cycles of 20% strain in a nitrogen-filled glove box (25 °C, O<sub>2</sub> < 5 ppm, H<sub>2</sub>O < 0.01 ppm).

| Test cycles | $V_{OC}$<br>(V) | $J_{SC}$<br>(mA cm <sup>-2</sup> ) | FF<br>(%) | PCE<br>(%) | Norm.<br>PCE (%) |
|-------------|-----------------|------------------------------------|-----------|------------|------------------|
| 0           | 0.885           | 23.03                              | 47.92     | 9.83       | 100.00           |
| 50          | 0.883           | 22.52                              | 44.54     | 8.96       | 91.15            |
| 100         | 0.876           | 21.56                              | 42.00     | 7.93       | 80.67            |
| 150         | 0.855           | 21.01                              | 35.71     | 6.41       | 65.20            |
| 200         | 0.846           | 20.23                              | 33.41     | 5.72       | 58.18            |

**Table S14.** Device parameters of IS-OSCs under stretching-releasing cycles of 20% strain under ambient conditions (~40% RH, atmospheric oxygen).

| Test cycles | $V_{OC}$<br>(V) | $J_{SC}$<br>(mA cm <sup>-2</sup> ) | FF<br>(%) | PCE<br>(%) | Norm.<br>PCE (%) |
|-------------|-----------------|------------------------------------|-----------|------------|------------------|
| 0           | 0.884           | 22.65                              | 44.03     | 8.82       | 100.00           |
| 50          | 0.878           | 21.84                              | 41.71     | 8.00       | 91.27            |
| 100         | 0.854           | 21.02                              | 37.29     | 6.70       | 75.96            |
| 150         | 0.828           | 19.58                              | 33.40     | 5.41       | 61.34            |
| 200         | 0.811           | 18.86                              | 29.95     | 4.58       | 51.93            |

## References:

- [1] E. C. Montoto, Y. Cao, K. Hernández-Burgos, C. S. Sevov, M. N. Braten, B. A. Helms, J. S. Moore, J. Rodríguez-López, *Macromolecules* **2018**, *51*, 3539.
- [2] Y. Amamoto, H. Otsuka, A. Takahara, K. Matyjaszewski, *Adv. Mater.* **2012**, *24*, 3975.
- [3] J. Ilavsky, *J. Appl. Crystallogr.* **2012**, *45*, 324.

- [4] X. Luo, G. Freychet, Z. Gan, K. An, H. Du, C. Wang, N. Li, W. Zhong, L. Ying, *Macromolecules* **2023**, *56*, 8928.
- [5] T. Lu and F. Chen, *Journal of Computational Chemistry*, 2012, **33**, 580–592.
- [6] W. Humphrey, A. Dalke and K. Schulten, *Journal of Molecular Graphics*, 1996, **14**, 33–38.
- [7] J. Zhang, Y. Niu, C. Huang, L. Xiao, Z. Chen, K. Yang and Y. Wang, *Polymer Chemistry*, 2012, **3**, 1390-1393.
- [8] R. Zheng, Y. Wang, C. Jia, Z. Wan, J. Luo, H. A. Malik, X. Weng, J. Xie and L. Deng, *ACS Appl. Mater. Interfaces*, 2018, **10**, 35533-35538.
- [9] Y. Amamoto, H. Otsuka, A. Takahara, K. Matyjaszewski, *Adv. Mater.* **2012**, *24*, 3975
- [10] N. J. Bongiardina, S. M. Soars, M. Podgorski, C. N. Bowman, *Polymer Chemistry* **2022**, *13*, 3991
- [11] P. Wang, L. Yang, B. Dai, Z. Yang, S. Guo, G. Gao, L. Xu, M. Sun, K. Yao and J. Zhu, *Eur. Polym. J.*, 2020, **123**, 109382.
- [12] X. Cao, P. Zhang, N. Guo, Y. Tong, Q. Xu, D. Zhou and Z. Feng, *RSC Advances*, 2021, **11**, 2985-2994.
